# Supplementary material for: Soft confinement of self-propelled rods: simulation and theory
Source: Royal Society of Chemistry journal article supplement (doi:10.1039/d3sm01340e), 2024-01-01
Supplement: d3sm01340e1.pdf [file d3sm01340e1.pdf]

# Soft Confinement of Self-Propelled Rods: Simulation and Theory

## Supplementary Material

Kevin J. Modica<sup>a</sup> and Sho C. Takatori<sup>\*a</sup>

<sup>a</sup>Department of Chemical Engineering, University of California, Santa Barbara, Santa Barbara, CA 93106 USA.

\*Correspondence: Sho C. Takatori; stakatori@ucsb.edu

### 1 Potential Energy of a Discrete Rod in an External Field

In this section, we derive the effective potential energy a rod center of mass experiences at a given position and orientation. This derivation applies to rods made of a discrete number of point masses separated by distance  $\sigma$ . In the thin rod limit, we show that the energy for a discrete rod matches the continuous solution described in the main text.

For a rod made of  $N_s$  monomers spaced at distance  $\sigma$ , the potential acting on each **monomer** can be described by a Fourier series.

$$\phi(\mathbf{r}_i) = \frac{1}{N_s} \sum_{n,m} \hat{\phi}_{nm} e^{i2\pi \mathbf{k}_{nm} \cdot \mathbf{r}_i} \quad (1)$$

The position of each monomer on the rod can be described by:

$$\mathbf{r}_i = \mathbf{r} + s_i \sigma \mathbf{u} \quad (2)$$

where  $\mathbf{u} = \{\cos(\theta), \sin(\theta)\}^T$  is the orientation vector describing the direction to step away from the rod center of mass  $\mathbf{r}$ .  $s_i$  is an integer counting the number of monomer units away from the center of mass. For example, provided there are an odd number of monomers:

$$s = -\frac{N_s-1}{2}, \dots, -3, -2, -1, 0, 1, 2, 3, \dots, \frac{N_s-1}{2}$$

The potential energy of the entire rod is then:

$$V_{Rod}(\mathbf{r}, \theta) = \sum_i \frac{1}{N_s} \sum_{n,m} \hat{\phi}_{nm} e^{i2\pi \mathbf{k}_{nm} \cdot (\mathbf{r} + s_i \sigma \mathbf{u})} \quad (3)$$

Except for  $s_i = 0$  there are  $(N_s - 1)/2$  pairs of beads on opposite sides of the center of mass:  $s_i = \pm 1, \pm 2, \dots, \pm(N_s - 1)/2$ . Using the angle sum/difference formula we can describe the pairs as

$$e^{i2\pi \mathbf{k}_{nm} \cdot (\mathbf{r} + s_i \sigma \mathbf{u})} + e^{i2\pi \mathbf{k}_{nm} \cdot (\mathbf{r} - s_i \sigma \mathbf{u})} = 2e^{i2\pi \mathbf{k}_{nm} \cdot \mathbf{r}} \cos(2\pi \mathbf{k}_{nm} \cdot s_i \sigma \mathbf{u}). \quad (4)$$

Simplifying the sum provides the following expression:

$$V_{Rod}(\mathbf{r}, \theta) = \frac{1}{N_s} \sum_{n,m} \hat{\phi}_{nm} e^{i2\pi \mathbf{k}_{nm} \cdot \mathbf{r}} \left[ 1 + 2 \sum_{s_i=1}^{s_i=(N_s-1)/2} \cos(2\pi \mathbf{k}_{nm} \cdot s_i \sigma \mathbf{u}) \right] \quad (5)$$

The inner series can be solved exactly via telescopic sums:

$$S_M = 2 \sum_{s_i=1}^{s_i=(N_s-1)/2} \cos(2\pi \mathbf{k}_{nm} \cdot s_i \sigma \mathbf{u}) \quad (6a)$$

$$S_M = \csc(\pi \mathbf{k}_{nm} \cdot \sigma \mathbf{u}) \sin(N_s \pi \mathbf{k}_{nm} \cdot \sigma \mathbf{u}) - 1 \quad (6b)$$

Plugging this into the Eq. 5 gives the potential energy of a rod made of  $N_s$  monomers separated by distance  $\sigma$  in an external field.

$$V_{Rod}(\mathbf{r}, \theta) = \frac{1}{N_s} \sum_{n,m} \hat{\phi}_{nm} e^{i2\pi \mathbf{k}_{nm} \cdot \mathbf{r}} \csc(\pi \sigma \mathbf{k}_{nm} \cdot \mathbf{u}) \sin(\pi N_s \sigma \mathbf{k}_{nm} \cdot \mathbf{u}) \quad (7)$$

The discrete solution matches the continuous solution when  $N_s = \sigma^{-1} L_{Rod}$ , and  $\sigma \rightarrow 0^+$

$$\lim_{\sigma \rightarrow 0^+} \frac{\sigma}{L_{Rod}} \csc(\pi \sigma \mathbf{k}_{nm} \cdot \mathbf{u}) \sin(\pi L_{Rod} \mathbf{k}_{nm} \cdot \mathbf{u}) = \text{sinc}(\pi L_{Rod} \mathbf{k}_{nm} \cdot \mathbf{u}). \quad (8)$$

The convergence of the limit can be found by the Taylor series expansion around  $\sigma \rightarrow 0^+$

$$\lim_{\sigma \rightarrow 0^+} \frac{\sigma}{L_{Rod}} \csc(\pi \sigma \mathbf{k}_{nm} \cdot \mathbf{u}) \sin(\pi L_{Rod} \mathbf{k}_{nm} \cdot \mathbf{u}) = \text{sinc}(\pi L_{Rod} \mathbf{k}_{nm} \cdot \mathbf{u}) * \left( 1 + \frac{(\sigma \pi \mathbf{k}_{nm} \cdot \mathbf{u})^2}{6} + \frac{7(\sigma \pi \mathbf{k}_{nm} \cdot \mathbf{u})^4}{360} + \mathcal{O}(\sigma^6) \right) \quad (9)$$

## 2 Taylor Dispersion Theory for Active Rods

The general Smoluchowski equation for a thin active rod moving at a constant swim velocity  $U_0$  under an external potential field  $V(\mathbf{x}, \mathbf{r}, \theta, t)$  is given as:

$$\frac{\partial P(\mathbf{x}, \mathbf{r}, \theta, t)}{\partial t} + (\nabla_x + \nabla_r) \cdot \mathbf{J}_T + \frac{\partial}{\partial \theta} J_\theta = 0 \quad (10a)$$

$$\mathbf{J}_T = \left[ U_0 \mathbf{u} P - \mathbf{D}(\mathbf{u}) \cdot \left( (\nabla_x + \nabla_r) P + P(\nabla_x + \nabla_r) \left[ \frac{V}{k_B T} \right] \right) \right] \quad (10b)$$

$$J_\theta = -D_\theta \left( \frac{\partial}{\partial \theta} P + P \frac{\partial}{\partial \theta} \left[ \frac{V}{k_B T} \right] \right) \quad (10c)$$

Where  $\mathbf{x}$  is the lattice vector denoting global position,  $\mathbf{r}$  is the local vector denoting position inside a periodic cell,  $\theta$  is the rod orientation angle,  $\mathbf{u} = [\cos(\theta), \sin(\theta)]^T$  is the orientation unit vector, and  $t$  is time.  $k_B T$  is the thermal energy and  $\mathbf{D}(\mathbf{u})$  is the orientationally dependent diffusivity tensor. Assuming the potential is constant between lattices.  $\nabla_x \left[ \frac{V}{k_B T} \right] = \mathbf{0}$ . We simplify the equation and then take the Fourier transform over the lattice vector  $\mathbf{x} \rightarrow \mathbf{k}$ .

$$\frac{\partial \hat{P}(\mathbf{k}, \mathbf{r}, \theta, t)}{\partial t} + (i\mathbf{k} + \nabla_r) \cdot \hat{\mathbf{J}}_T + \frac{\partial}{\partial \theta} \hat{J}_\theta = 0 \quad (11a)$$

$$\hat{\mathbf{J}}_T(\mathbf{k}, \mathbf{r}, \theta, t) = \left[ U_0 \mathbf{u} \hat{P} - \mathbf{D}(\mathbf{u}) \cdot \left( (i\mathbf{k} + \nabla_r) \hat{P} + \hat{P} \nabla_r \left[ \frac{V}{k_B T} \right] \right) \right] \quad (11b)$$

$$\hat{J}_\theta(\mathbf{k}, \mathbf{r}, \theta, t) = -D_\theta \left( \frac{\partial}{\partial \theta} \hat{P} + \hat{P} \frac{\partial}{\partial \theta} \left[ \frac{V}{k_B T} \right] \right) \quad (11c)$$

Define the macroscopic number density  $\hat{n}(\mathbf{k}, t) = \langle \hat{P} \rangle_{\theta, r}$ , and then take the orientational and local position average of Eq. 11.  $\langle f \rangle_q$  is the integral of  $f$  over coordinate  $q$ .

$$\frac{\partial \hat{n}}{\partial t} + i\mathbf{k} \cdot \langle \hat{\mathbf{J}}_T \rangle_{\theta, r} + \langle \nabla_r \cdot \hat{\mathbf{J}}_T \rangle_{\theta, r} + \left\langle \frac{\partial}{\partial \theta} \hat{J}_\theta \right\rangle_{\theta, r} = 0 \quad (12)$$

From the divergence theorem, we know that  $\langle \nabla_r \cdot \hat{\mathbf{J}}_T \rangle_{\theta, r} = 0$  and  $\left\langle \frac{\partial}{\partial \theta} \hat{J}_\theta \right\rangle_{\theta, r} = 0$ .

### 2.0.1 General Fourier Transformed Macroscopic Number Density Equation

$$\frac{\partial \hat{n}(\mathbf{k}, t)}{\partial t} + i\mathbf{k} \cdot \langle \hat{\mathbf{J}}_T \rangle_{\theta, r} = 0 \quad (13a)$$

$$\langle \hat{\mathbf{J}}_T \rangle_{\theta, r} = \left[ U_0 \langle \mathbf{u} \hat{P} \rangle_{\theta, r} - \left\langle \mathbf{D}(\mathbf{u}) \cdot \left( (i\mathbf{k} + \nabla_r) \hat{P} + \hat{P} \nabla_r \left[ \frac{V}{k_B T} \right] \right) \right\rangle_{\theta, r} \right] \quad (13b)$$

## 2.1 Assuming isotropic diffusivity

Assuming  $\mathbf{D}(\mathbf{u}) = D_T \mathbf{I}$  The Fourier Transformed Smoluchowski equation is:

$$\frac{\partial \hat{P}(\mathbf{k}, \mathbf{r}, \theta, t)}{\partial t} + (i\mathbf{k} + \nabla_r) \cdot \hat{\mathbf{J}}_T + \frac{\partial}{\partial \theta} \hat{f}_\theta = 0 \quad (14a)$$

$$\hat{\mathbf{J}}_T(\mathbf{k}, \mathbf{r}, \theta, t) = \left[ U_0 \mathbf{u} \hat{P} - D_T \left( (i\mathbf{k} + \nabla_r) \hat{P} + \hat{P} \nabla_r \left[ \frac{V}{k_B T} \right] \right) \right] \quad (14b)$$

$$\hat{f}_\theta(\mathbf{k}, \mathbf{r}, \theta, t) = -D_\theta \left( \frac{\partial}{\partial \theta} \hat{P} + \hat{P} \frac{\partial}{\partial \theta} \left[ \frac{V}{k_B T} \right] \right) \quad (14c)$$

And the macroscopic density is:

$$\frac{\partial \hat{n}(\mathbf{k}, t)}{\partial t} + i\mathbf{k} \cdot \langle \hat{\mathbf{J}}_T \rangle_{\theta, r} = 0 \quad (15a)$$

$$\langle \hat{\mathbf{J}}_T \rangle_{\theta, r} = \left[ U_0 \langle \mathbf{u} \hat{P} \rangle_{\theta, r} - D_T \left( i\mathbf{k} \langle \hat{P} \rangle_{\theta, r} + \langle \nabla_r \hat{P} \rangle_{\theta, r} + \left\langle \hat{P} \nabla_r \left[ \frac{V}{k_B T} \right] \right\rangle_{\theta, r} \right) \right] \quad (15b)$$

We define the Fourier transformed structure function in terms of the Fourier transformed probability and macroscopic density  $\hat{G}(\mathbf{k}, \mathbf{r}, \theta, t) = \hat{P}/\hat{n}$ . We multiply Eq. 15 by  $\hat{G}$  and subtract from Eq. 11

$$\frac{\partial \hat{P}}{\partial t} - \hat{G} \frac{\partial \hat{n}}{\partial t} + i\mathbf{k} \cdot (\hat{\mathbf{J}}_T - \hat{G} \langle \hat{\mathbf{J}}_T \rangle_{\theta, r}) + \nabla_r \cdot \hat{\mathbf{J}}_T + \frac{\partial}{\partial \theta} \hat{f}_\theta = 0 \quad (16)$$

Now divide the equation by  $\hat{n}$ , recognizing that from the chain rule acting on  $\hat{P} = \hat{G}\hat{n}$  gives  $\frac{\partial \hat{P}}{\partial t} - \hat{G} \frac{\partial \hat{n}}{\partial t} = \hat{n} \frac{\partial \hat{G}}{\partial t}$

$$\frac{\partial \hat{G}}{\partial t} + \frac{1}{\hat{n}} i\mathbf{k} \cdot (\hat{\mathbf{J}}_T - \hat{G} \langle \hat{\mathbf{J}}_T \rangle_{\theta, r}) + \frac{1}{\hat{n}} \nabla_r \cdot \hat{\mathbf{J}}_T + \frac{1}{\hat{n}} \frac{\partial}{\partial \theta} \hat{f}_\theta = 0 \quad (17a)$$

$$\frac{1}{\hat{n}} i\mathbf{k} \cdot (\hat{\mathbf{J}}_T - \hat{G} \langle \hat{\mathbf{J}}_T \rangle_{\theta, r}) = i\mathbf{k} \cdot ($$

$$U_0 \mathbf{u} \hat{G} - \hat{G} U_0 \langle \mathbf{u} \hat{G} \rangle_{\theta, r} \quad (17b)$$

$$- D_T \left[ (i\mathbf{k} + \nabla_r) \hat{G} + \hat{G} \nabla_r \left[ \frac{V}{k_B T} \right] \right] + \hat{G} \left[ D_T \left( i\mathbf{k} \langle \hat{G} \rangle_{\theta, r} + \langle \nabla_r \hat{G} \rangle_{\theta, r} + \left\langle \hat{G} \nabla_r \left[ \frac{V}{k_B T} \right] \right\rangle_{\theta, r} \right) \right]$$

$$+ \frac{1}{\hat{n}} (\nabla_r \cdot \hat{\mathbf{J}}_T + \frac{\partial}{\partial \theta} \hat{f}_\theta) = \nabla_r \cdot \left[ U_0 \mathbf{u} \hat{G} - D_T \left( (i\mathbf{k} + \nabla_r) \hat{G} + \hat{G} \nabla_r \left[ \frac{V}{k_B T} \right] \right) \right] + \frac{\partial}{\partial \theta} \left[ -D_\theta \left( \frac{\partial}{\partial \theta} \hat{G} + \hat{G} \frac{\partial}{\partial \theta} \left[ \frac{V}{k_B T} \right] \right) \right] \quad (17c)$$

$\hat{n}$  only depends on time and wavenumber, so it can be brought into the derivatives and integrals.

After taking advantage of the fact that  $\hat{P}/\hat{n} = \hat{G}$ , we expand  $\hat{G}$  in low wave numbers, and then we group terms in Eq. 17 based on  $\mathbf{k}$  order.

$$\hat{G}(\mathbf{k}, \mathbf{r}, \theta, t) = g(\mathbf{r}, \theta, t) + i\mathbf{k} \cdot \mathbf{d}(\mathbf{r}, \theta, t) + \mathcal{O}(\mathbf{k}\mathbf{k}) \quad (18)$$

The  $\mathcal{O}(1)$  term, or the  $\mathbf{k}$ -independent field  $g$  represents the local probability density in a periodic array with identical conditions.

$$\frac{\partial g}{\partial t} + \nabla_r \cdot \mathbf{j}_T^{(0)} + \frac{\partial}{\partial \theta} j_\theta^{(0)} = 0 \quad (19a)$$

$$\mathbf{j}_T^{(0)} = U_0 \mathbf{u} g - D_T \left( \nabla_r g + g \nabla_r \left[ \frac{V}{k_B T} \right] \right) \quad (19b)$$

$$j_\theta^{(0)} = -D_\theta \left( \frac{\partial}{\partial \theta} g + g \frac{\partial}{\partial \theta} \left[ \frac{V}{k_B T} \right] \right) \quad (19c)$$

The  $\mathcal{O}(\mathbf{k})$  field  $\mathbf{d}$  is the dispersion field. It represents the first correction due to dispersion from to a mild concentration gradient.

$$\frac{\partial \mathbf{d}}{\partial t} + \nabla_r \cdot \mathbf{j}_T^{(1)} + \frac{\partial}{\partial \theta} \mathbf{j}_\theta^{(1)} + U_0 \mathbf{u} g - g U_0 \langle \mathbf{u} g \rangle_{\theta,r} - D_T \left[ \nabla_r g + g \nabla_r \left[ \frac{V}{k_B T} \right] \right] + g D_T \left[ \langle \nabla_r g \rangle_{\theta,r} + \left\langle g \nabla_r \left[ \frac{V}{k_B T} \right] \right\rangle_{\theta,r} \right] = 0 \quad (20a)$$

$$\mathbf{j}_T^{(1)} = U_0 \mathbf{u} \mathbf{d} - D_T \left( g \mathbf{I} + \nabla_r \mathbf{d} + \mathbf{d} \nabla_r \left[ \frac{V}{k_B T} \right] \right) \quad (20b)$$

$$\mathbf{j}_\theta^{(1)} = -D_\theta \left( \frac{\partial}{\partial \theta} \mathbf{d} + \mathbf{d} \frac{\partial}{\partial \theta} \left[ \frac{V}{k_B T} \right] \right) \quad (20c)$$

These equations are solved under periodic boundary conditions subject to  $\langle g \rangle_{\theta,r} = 1$  and  $\langle \mathbf{d} \rangle_{\theta,r} = \mathbf{0}$ .

Finally, we can relate averages of the local density and fluctuation to transport quantities via the macroscopic density equation:

$$\frac{\partial \hat{n}(\mathbf{k}, t)}{\partial t} + i\mathbf{k} \cdot \langle \hat{\mathbf{J}}_T \rangle_{\theta,r} = 0 \quad (21a)$$

$$\langle \hat{\mathbf{J}}_T \rangle_{\theta,r} = \hat{n} [\mathbf{U}_E - i\mathbf{k} \cdot \mathbf{D}_E] = \left[ U_0 \langle \mathbf{u} \hat{P} \rangle_{\theta,r} - D_T \left( i\mathbf{k} \langle \hat{P} \rangle_{\theta,r} + \langle \nabla_r \hat{P} \rangle_{\theta,r} + \left\langle \hat{P} \nabla_r \left[ \frac{V}{k_B T} \right] \right\rangle_{\theta,r} \right) \right] \quad (21b)$$

Replace  $\hat{P} = \hat{n}(g + i\mathbf{k} \cdot \mathbf{d} + \dots)$

$$\langle \hat{\mathbf{J}}_T \rangle_{\theta,r} = \left[ U_0 \langle \mathbf{u} \hat{n}(g + i\mathbf{k} \cdot \mathbf{d}) \rangle_{\theta,r} - D_T \left( i\mathbf{k} \langle \hat{n}(g + i\mathbf{k} \cdot \mathbf{d}) \rangle_{\theta,r} + \langle \nabla_r \hat{n}(g + i\mathbf{k} \cdot \mathbf{d}) \rangle_{\theta,r} + \left\langle \hat{n}(g + i\mathbf{k} \cdot \mathbf{d}) \nabla_r \left[ \frac{V}{k_B T} \right] \right\rangle_{\theta,r} \right) \right] \quad (22)$$

Factor out  $\hat{n}$  and remove the higher order  $\mathcal{O}(\mathbf{k}\mathbf{k})$  term

$$\hat{n} [\mathbf{U}_E - i\mathbf{k} \cdot \mathbf{D}_E] = \hat{n} \left[ U_0 \langle \mathbf{u}(g + i\mathbf{k} \cdot \mathbf{d}) \rangle_{\theta,r} - D_T \left( i\mathbf{k} \langle g \rangle_{\theta,r} + \langle \nabla_r (g + i\mathbf{k} \cdot \mathbf{d}) \rangle_{\theta,r} + \left\langle (g + i\mathbf{k} \cdot \mathbf{d}) \nabla_r \left[ \frac{V}{k_B T} \right] \right\rangle_{\theta,r} \right) \right] \quad (23)$$

Finally, grouping like terms

$$\mathbf{U}_E = \left[ U_0 \langle \mathbf{u} g \rangle_{\theta,r} - D_T \left( \langle \nabla_r g \rangle_{\theta,r} + \left\langle g \nabla_r \left[ \frac{V}{k_B T} \right] \right\rangle_{\theta,r} \right) \right] \quad (24)$$

$$\mathbf{D}_E = D_T \mathbf{I} - \left[ U_0 \langle \mathbf{u} \mathbf{d} \rangle_{\theta,r} - D_T \left( \langle \nabla_r \mathbf{d} \rangle_{\theta,r} + \left\langle \mathbf{d} \nabla_r \left[ \frac{V}{k_B T} \right] \right\rangle_{\theta,r} \right) \right] \quad (25)$$
